# Supplementary material for: Relationships among Sleep Time, Physical Activity Time, Screen Time, and Nutrition Literacy of Adolescents: A Cross-Sectional Study in Chongqing, China
Source: MDPI journal article supplement (doi:10.3390/nu16091314), 2024-04-27
Supplement: s1 [file s1]

## **Evaluation of nutritional literacy of middle school students in Chongqing**

### **informed consent**

Dear Classmates (Freshman, Junior, Senior).

We would like to invite you to participate in the survey on nutritional literacy of secondary school students in Chongqing. With your help, we will collect relevant data to evaluate the nutritional literacy status of secondary school students and provide reference for carrying out relevant nutritional education work. With your help, we will collect relevant data to evaluate the nutritional literacy status of secondary school students and provide reference for carrying out relevant nutritional education work. Please fill out the survey truthfully, we will keep the data confidential and use it only for group analysis without any risk to you. Please fill out the survey truthfully, we will keep the data confidential and use it only for group analysis without any risk to you. This survey is completely voluntary and you can withdraw at any stage.

I have read this informed consent and voluntarily participate in this assessment after full consideration. [Multiple choice]\*

☐ YES

☐ NO (Please skip to the end of the questionnaire and submit the answer sheet)

### **PART1, the general situation**

**1.Your school name is:** [Fill in the blank] \*

---

**2.Your year of birth** [multiple choice]\*

☐ 1995

☐ 1996

☐ 1997

☐ 1998

☐ 1999

☐2000

☐2001

☐2002

☐2003

☐2004

☐2005

☐2006

☐2007

☐2008

☐2009

☐2010

**3.Your birth month** [multiple choice] \*

☐January

☐February

☐March

☐April

☐May

☐June

☐July

☐August

☐September

☐October

☐November

☐December

**4.Your gender:** [multiple choice] \*

☐ male

☐ female

**5.What is your nationality:** [Multiple choice] \*

☐ Han nationality

☐ Miao nationality

☐ Tujia nationality

☐ Hui nationality

☐ Other \_\_\_\_\_

**6.Your grade:** [Multiple choice]\*

Grade one of junior high school

☐ grade two of junior school

☐ Senior One

☐ Senior Two

**7.Are you currently living on campus:** [multiple choice] \*

☐ YES

☐ NO

**8.Where your family lives:** [Multiple choice]\*

☐ urban

☐ rural

**9.Are you an only child?**

☐ YES

☐ NO, How many brothers and sisters \_\_\_\_\_ \*

**10. Your primary guardian (i.e. the person who is primarily responsible for your daily life) :** [multiple choice]\*

☐ Father

☐ Mother

Grandparents

☐ relative

☐ someone else \_\_\_\_\_

**11. Your parents' level of education:** [Matrix multiple choice] \*

|         | Primary and below | junior high school | High school/secondary school/vocational high school | College/Bachelor degree or above | be unaware of |
|---------|-------------------|--------------------|-----------------------------------------------------|----------------------------------|---------------|
| Father. |                   |                    |                                                     |                                  |               |
| Mother  |                   |                    |                                                     |                                  |               |

## II. Nutrient Literacy Scale

1. Please sort the layers of the "Dietary Pagoda for Chinese Residents" diagram with the corresponding food groups.

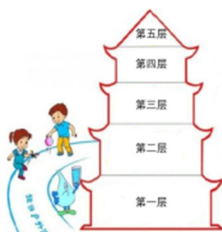

[For sorting questions, please fill in the numbers in parentheses] \*

☐ Pork, chicken, duck, fish, eggs, etc.

☐ Rice noodles, sweet potatoes, green beans, etc.

☐ Milk and milk products, soybeans and their products

☐ Cooking oil, salt

☐ Vegetables, fruits

2. Based on your judgment, please check the appropriate box [matrix multiple choice question] \*

|                                                                                                            | properly | incorrect | I don't know. |
|------------------------------------------------------------------------------------------------------------|----------|-----------|---------------|
| 1. Coarse grains (millet, corn, etc.) are more nutritionally complete than fine grains (rice, flour, etc.) |          |           |               |
| 2. Smoked, salted foods increase cancer risk                                                               |          |           |               |
| 3. Overweight or underweight is associated with an increased risk of disease development                   |          |           |               |
| 4. Try to eat lean meat when eating livestock                                                              |          |           |               |
| 5. Good eating habits can prevent chronic diseases like high blood pressure and diabetes                   |          |           |               |
| 6. You can exercise less if                                                                                |          |           |               |

|                                                                 |  |  |  |
|-----------------------------------------------------------------|--|--|--|
| you eat less yourself                                           |  |  |  |
| 7.Drinking water should be done in small quantities             |  |  |  |
| 8. Meal portioning helps to avoid oral transmission of diseases |  |  |  |

3.The benefits of eating soy products such as tofu and soymilk are [multiple choice] \*

It's good for your health.

- ☐ Good for cardiovascular patients
- ☐ Increase intake of high quality protein
- ☐ Preventing the negative effects of excessive meat consumption
- ☐ I don't know.

4.The content of the Dietary Guidelines for Chinese Residents can be easily understood  
[Single-choice question] \*

I've never heard of the Chinese Dietary Guidelines.

I totally disagree.

- ☐ Disagree
- ☐ Neutrality

☐ Agreed

☐ I couldn't agree more.

5. When you eat, your first thought is [Single choice] \*

☐ XX Flavors

☐ Nutrition

☐ Fill up on hunger

☐ Keep in shape

☐ Other

☐ No standard

6. When choosing packaged foods, what information on the bag do you look for?  
[Multiple choice question] \*

☐ Date of manufacture

☐ Shelf life

☐ Nutrition Facts Table

☐ Manufacturer

☐ I don't know.

☐ I haven't been paying attention.

7. Please select the 3 snacks you eat most often (snacks: all food and drinks (excluding water) consumed outside of the three meal times of the day) [Multiple Choice] \*

☐ Beverages (e.g., cola, yogurt)

- ☐ Cold drinks (e.g., ice cream, gelato)
- ☐ Pastries (e.g., bread, cookies)
- ☐ Confectionery (e.g., chocolate, lollipops)
- ☐ Fresh fruits and vegetables
- ☐ Puffed food (e.g. shrimp sticks, snow cakes)
- ☐ Fried (e.g. potato chips, instant noodles)
- ☐ Nuts (e.g. melon seeds, peanuts)
- ☐ Milk and its products (e.g., plain milk, yogurt)
- ☐ Soybeans and their products (soy milk, dried tofu)

8.Dried fruits and vegetables (e.g. raisins), candied fruits (e.g. dried fruits), canned fruits, etc.

- ☐ Others \_\_\_\_\_
- ☐ Never eat the above food

9.Recall how many total food items (excluding oils and condiments) you ate during the day yesterday, e.g., a serving of tomato and egg pasta contains 3 food items: tomato, egg, and flour. [Single Choice] \*

- ☐ 0~4 types
- ☐ 5~8 types
- ☐ 9~11 types
- ☐  $\geq 12$  types
- ☐ I don't know.



10. Frequency of breakfast in the past week [multiple choice]\*

☐ I didn't eat it.

☐ 1~2 days

☐ 3~4 days

☐ 5~6 days

☐ I eat every day.

11. Eating Behavior [Matrix Single Choice] \*

|                                                                                  | 0th | 1 time | 2 to 6 times | 1 time per day | 2 or more times per day |
|----------------------------------------------------------------------------------|-----|--------|--------------|----------------|-------------------------|
| 1. Frequency of eating fresh fruit in the past week                              |     |        |              |                |                         |
| 2. Frequency of drinking milk, yogurt, soy milk, etc. in the past week           |     |        |              |                |                         |
| 3. Frequency of drinking sugary beverages (e.g. soft drinks, fruit and vegetable |     |        |              |                |                         |

|                                                                                                                                                                                                               |  |  |  |  |  |
|---------------------------------------------------------------------------------------------------------------------------------------------------------------------------------------------------------------|--|--|--|--|--|
| juice drinks,<br>tea drinks,<br>functional<br>drinks, etc.) in<br>the past week                                                                                                                               |  |  |  |  |  |
| 4. Average<br>weekly<br>frequency of<br>having eaten<br>or ordered<br>takeout from<br>Western fast<br>food<br>restaurants<br>(e.g.<br>McDonald's,<br>KFC, pizza<br>restaurants,<br>etc.) in the<br>past month |  |  |  |  |  |
| 5. Average<br>weekly<br>frequency of<br>eating smoked<br>foods (e.g.,<br>bacon,<br>sausages, etc.)<br>in the past<br>month                                                                                    |  |  |  |  |  |

12. Have you ever had a glass of wine (a glass of wine is the equivalent of half a bottle/glass of beer, a small glass of white wine, a glass of wine or yellow wine) [Single Choice] \*

☐ Yes

☐ No

13. Your last measured height was \_\_\_\_ centimeters (cm) and your weight was \_\_\_\_ kilograms (kg) [fill in the blanks] \*

14. Which category do you think your current weight falls into? [Single choice question] \*

☐ Low weight

☐ Normal

☐ Overweight

☐ Obesity

☐ I don't know.

15. Please answer the following questions based on your last week (study days are Monday through Friday; days off are Saturday and Sunday)

16. The amount of sleep (including lunch breaks) you get on study days is [single choice] \*

☐ < 7 hours

☐ [7 , 8) hours

☐ [8 , 9) hours

☐ [9 , 10) hours

☐ ≥ 10 hours

17.The amount of **sleep** (including lunch breaks) you get on **your days off** is [single choice] \*

☐  $< 7$  hours

☐  $[7, 8)$  hours

☐  $[8, 9)$  hours

☐  $[9, 10)$  hours

☐  $\geq 10$  hours

18.The amount of time you spend on **physical activity** (including housework, leisure activities, sports, and physical exercise such as hiking, jumping rope, etc.) on **study days** is [single choice] \*

☐  $< 0.5$  hours

☐  $[0.5, 1)$  hours

☐  $[1, 1.5)$  hours

☐  $[1.5, 2)$  hours

☐  $\geq 2$  hours

19.The amount of time you spend on **physical activity** (including housework, leisure activities, sports, and physical exercise such as hiking, jumping rope, etc.) on **your days off** is [single choice] \*

☐  $< 0.5$  hours

☐  $[0.5, 1)$  hours

☐  $[1, 1.5)$  hours

☐ [1.5 , 2) hours

☐  $\geq 2$  hours

20. On study days your video screen time (time spent looking at electronic screens such as TV, computers, tablets, video game consoles, or cell phones) is [single choice] \*

☐ <1 hour

☐ [1 , 2) hours

☐ [2 , 3) hours

☐ [3 , 4) hours

☐  $\geq 4$  hours

21. On your days off your video screen time (time spent looking at electronic screens such as TV, computers, tablets, video game consoles, or cell phones) is [Single Choice] \*

☐ <1 hour

☐ [1 , 2) hours

☐ [2 , 3) hours

☐ [3 , 4) hours

☐  $\geq 4$  hours

22. Acquisition of skills versus comprehension of skills [matrix multiple choice questions]

\*

|                     | Completely disagree. | disagree | neutral | agree with | couldn't agree more |
|---------------------|----------------------|----------|---------|------------|---------------------|
| 1. seeks answers to |                      |          |         |            |                     |

|                                                                                                                                           |  |  |  |  |  |
|-------------------------------------------------------------------------------------------------------------------------------------------|--|--|--|--|--|
| questions about nutrition-related knowledge or skills that he or she does not understand                                                  |  |  |  |  |  |
| 2. know where to find accurate information when faced with nutrition-related questions or wanting to learn about healthy eating behaviors |  |  |  |  |  |
| 3. have no difficulty finding                                                                                                             |  |  |  |  |  |

|                                                                                                                                         |  |  |  |  |  |
|-----------------------------------------------------------------------------------------------------------------------------------------|--|--|--|--|--|
| the<br>nutritional<br>information<br>they<br>need from<br>a large<br>number of<br>sources of<br>information                             |  |  |  |  |  |
| 4. can<br>easily<br>understand<br>nutritional<br>information<br>on food<br>packages<br>(e.g.,<br>energy,<br>protein,<br>sugar,<br>etc.) |  |  |  |  |  |
| 5. can<br>easily<br>understand<br>health<br>and<br>nutrition<br>recommen                                                                |  |  |  |  |  |

|                                                                                                                |  |  |  |  |  |
|----------------------------------------------------------------------------------------------------------------|--|--|--|--|--|
| dations<br>relevant to<br>middle<br>school<br>students                                                         |  |  |  |  |  |
| 6. can<br>easily<br>understan<br>d<br>nutritional<br>informatio<br>n read in<br>books or<br>on the<br>internet |  |  |  |  |  |

23. Interactive skills [matrix radio question] \*

|                                                                                    | Not at all. | unwilling | neutral | willing (do sth) | very<br>willing |
|------------------------------------------------------------------------------------|-------------|-----------|---------|------------------|-----------------|
| 1.<br>Willingne<br>ss to<br>proactivel<br>y access<br>nutrition<br>informatio<br>n |             |           |         |                  |                 |
| 2.<br>Willingne                                                                    |             |           |         |                  |                 |



|                                                                                                                |  |  |  |  |  |
|----------------------------------------------------------------------------------------------------------------|--|--|--|--|--|
| ss to share<br>nutritional<br>health<br>knowledg<br>e with<br>others                                           |  |  |  |  |  |
| 3.<br>Willingne<br>ss to<br>receive<br>nutrition<br>education                                                  |  |  |  |  |  |
| 4.<br>Willingne<br>ss to apply<br>nutritional<br>knowledg<br>e gained<br>to change<br>poor<br>eating<br>habits |  |  |  |  |  |
| 5.<br>Willingne<br>ss to<br>persuade<br>others to<br>change<br>bad eating                                      |  |  |  |  |  |

|        |  |  |  |  |  |
|--------|--|--|--|--|--|
| habits |  |  |  |  |  |
|--------|--|--|--|--|--|

24.Eating Behaviors and Interactive, Critical Skills [Matrix Single Choice] \*

|                                                                         | Never had<br>that<br>experience | never | infrequent | now and<br>then | often | always |
|-------------------------------------------------------------------------|---------------------------------|-------|------------|-----------------|-------|--------|
| 1.<br>Replacing<br>vegetables<br>with fruits                            |                                 |       |            |                 |       |        |
| 2.<br>Replacing<br>meals with<br>snacks                                 |                                 |       |            |                 |       |        |
| 3.<br>Replacing<br>fresh<br>vegetables<br>with<br>pickles<br>and sauces |                                 |       |            |                 |       |        |
| 4.<br>Replacem<br>ent of<br>fresh fruit<br>with<br>processed<br>fruit   |                                 |       |            |                 |       |        |

|                                                                                              |  |  |  |  |  |  |
|----------------------------------------------------------------------------------------------|--|--|--|--|--|--|
| products<br>such as<br>canned<br>fruit, dried<br>fruit, etc.                                 |  |  |  |  |  |  |
| 5.<br>Thaw<br>frozen<br>food at<br>room<br>temperatur<br>e                                   |  |  |  |  |  |  |
| 6.<br>Will store<br>cooked<br>food at<br>room<br>temperatur<br>e for more<br>than 2<br>hours |  |  |  |  |  |  |
| 7.<br>Separate<br>cutting<br>boards,<br>knives and<br>other<br>utensils<br>for               |  |  |  |  |  |  |

|                                                                                                    |  |  |  |  |  |  |
|----------------------------------------------------------------------------------------------------|--|--|--|--|--|--|
| processing<br>and<br>serving<br>raw and<br>cooked<br>meat                                          |  |  |  |  |  |  |
| 8.<br>Try to<br>consume<br>all the<br>meat in<br>bulk and<br>ready-to-<br>eat food in<br>one meal. |  |  |  |  |  |  |
| 9.<br>Patronizin<br>g food<br>stalls such<br>as<br>roadside<br>stands                              |  |  |  |  |  |  |
| 10.<br>Have three<br>meals at<br>regular<br>intervals                                              |  |  |  |  |  |  |
| 11.<br>Talking                                                                                     |  |  |  |  |  |  |

|                                                                                                                                                     |  |  |  |  |  |  |
|-----------------------------------------------------------------------------------------------------------------------------------------------------|--|--|--|--|--|--|
| about<br>nutrition<br>topics<br>with<br>others<br>(e.g.,<br>friends,<br>family,<br>etc.)                                                            |  |  |  |  |  |  |
| 12.<br>Share with<br>others<br>(e.g.,<br>friends,<br>family,<br>etc.) the<br>nutritional<br>informatio<br>n I receive<br>from<br>various<br>sources |  |  |  |  |  |  |
| 13.<br>Pay<br>attention<br>to<br>nutritional<br>informatio<br>n in the<br>media                                                                     |  |  |  |  |  |  |

|                                                                                                                                          |  |  |  |  |  |  |
|------------------------------------------------------------------------------------------------------------------------------------------|--|--|--|--|--|--|
| (e.g.,<br>school<br>curriculum,<br>Internet,<br>books/bro-<br>chures,<br>television)                                                     |  |  |  |  |  |  |
| 14.<br>Critical of<br>nutritional<br>informatio-<br>n from<br>various<br>sources in<br>society                                           |  |  |  |  |  |  |
| 15.<br>The<br>accuracy<br>and<br>scientific<br>validity of<br>nutrition-<br>related<br>informatio-<br>n in the<br>media can<br>be judged |  |  |  |  |  |  |
| 16. Be                                                                                                                                   |  |  |  |  |  |  |

|                                                                                                          |  |  |  |  |  |  |
|----------------------------------------------------------------------------------------------------------|--|--|--|--|--|--|
| able to determine the validity of conflicting nutritional information through media reporting channels.  |  |  |  |  |  |  |
| 17.<br>Will correct their unhealthy behaviors based on nutritional information disseminated by the media |  |  |  |  |  |  |
| 18.<br>Dare to question deeply entrenched                                                                |  |  |  |  |  |  |

|                                                             |  |  |  |  |  |  |
|-------------------------------------------------------------|--|--|--|--|--|--|
| sociocultural<br>phenomena related<br>to food<br>and health |  |  |  |  |  |  |
|-------------------------------------------------------------|--|--|--|--|--|--|

25.Critical Skills [Matrix Multiple Choice] \*

|                                                                                           | tricky | It's a little<br>difficult. | general | It's a little<br>simple. | very simple |
|-------------------------------------------------------------------------------------------|--------|-----------------------------|---------|--------------------------|-------------|
| 1.<br>Ease of<br>distinguishing<br>whether<br>nutritional<br>information is<br>scientific |        |                             |         |                          |             |
| 2.<br>Ease of<br>distinguishing<br>between<br>healthy<br>and less<br>healthy<br>foods     |        |                             |         |                          |             |
| 3.                                                                                        |        |                             |         |                          |             |



|                                                                                             |  |  |  |  |  |
|---------------------------------------------------------------------------------------------|--|--|--|--|--|
| Ease of assessing the impact of dietary habits on health                                    |  |  |  |  |  |
| 4. When given some advice on healthy eating, I can determine what meets my own health needs |  |  |  |  |  |

This is the end of the questionnaire! If you want to know your level of nutritional literacy, please fill in your student number to facilitate our later feedback. [Fill in the blank]

---
